# Supplementary material for: Definition of the zebrafish genome using flow cytometry and cytogenetic mapping
Source: PubMed Central journal article supplement (PMC1925092; doi:10.1186/1471-2164-8-195), 2007-06-27
Supplement: 1471-2164-8-195-S1.pdf [file 1471-2164-8-195-S1.pdf]

**Additional file 1.** A table listing 510 BAC clones assigned to a unique LG chromosome location by cytogenetic mapping and the predicted LG chromosome location indicated by four zebrafish genome databases (as of August 2006). The 510 BAC clones were assigned to a chromosome, chromosome arm, and region within each chromosome arm as observed with cytogenetic mapping. The current genome assembly position (as of May 2007) for each BAC clone was then integrated with the cytogenetic mapping data to further order the BAC clones within each chromosomal region. It should be denoted that LG chromosomes 3, 5, 7, 8, 17, 18, 21, 22, and 25 are inverted.

| BAC clone | <u>Chromosomal mapping data</u>  |                                 |                                |                   |                                          |                |                                        | <u>Bioinformatic mapping data</u> |                                                     |                        |
|-----------|----------------------------------|---------------------------------|--------------------------------|-------------------|------------------------------------------|----------------|----------------------------------------|-----------------------------------|-----------------------------------------------------|------------------------|
|           | LG by UCSC genome browser (Zv6)* | LG by Ensembl (Zv6-release 40)* | LG by Sanger Web FPC database* | LG by Vega (v20)* | LG chromosome assignment by FISH mapping | Chromosome arm | Relative position along chromosome arm | LG by Zv6 (UCSC-May 2007)         | Chromosome position                                 | Mapping done by        |
| zC093G23  | 1                                | 1 and 2                         | 1                              | 1                 | 1                                        | p              | telomeric                              | 1                                 | 5257622-5270959                                     | 1 BAC End              |
| zC260P11  | 18                               | 18                              | 6                              | 6                 | 1                                        | p              | telomeric                              | 18                                | 58240764-58390425                                   | 2 BAC Ends             |
| zC132G01  | NA                               | 1                               | 1                              | NA                | 1                                        | p              | subtelomeric                           | 1                                 | 391825-558853<br>391825-560296                      | 2 BAC Ends             |
| zC172N16  | 1                                | 1                               | 1                              | 1                 | 1                                        | p              | distal                                 | 1                                 | 3902378-3915652<br>3904118-3917392                  | 1 BAC End              |
| zC281A20  | 1                                | 1                               | 1                              | NA                | 1                                        | p              | distal                                 | 1                                 | 5556971-5696107                                     | 2 BAC Ends             |
| zK279K15  | NA                               | NA                              | 1                              | 1                 | 1                                        | p              | distal                                 | NA                                |                                                     |                        |
| zC103I06  | 1                                | 1                               | 1                              | 1                 | 1                                        | p              | medial                                 | 1                                 | 4068088-4242225                                     | 2 BAC Ends             |
| zK020N03  | 1                                | NA                              | 1                              | 1                 | 1                                        | p              | medial                                 | 1                                 | 21167682-21306520                                   | 2 BAC Ends             |
| zK245P14  | 1                                | NA                              | 1                              | 1                 | 1                                        | p              | near the centromere                    | 1                                 | 21769832-21965463                                   | 2 BAC Ends             |
| zC145B13  | 1                                | 1                               | 1                              | 1                 | 1                                        | p              | near the centromere                    | 1                                 | 34832677-34985267                                   | 2 BAC Ends             |
| zC154P15  | 1                                | 1                               | NA                             | NA                | 1                                        | p              | near the centromere                    | 1                                 | 35169267-35182532                                   | 1 BAC End              |
| zK025O16  | 1                                | NA                              | 1                              | 1                 | 1                                        | p              | near the centromere                    | 1                                 | 37058682-37292992                                   | 2 BAC Ends             |
| zC127F23  | 1                                | 1                               | NA                             | NA                | 1                                        | p              | near the centromere                    | 1                                 | 65095752-65096438                                   | T51 RH Map             |
| zK200F03  | NA                               | NA                              | 1                              | NA                | 1                                        | p              | near the centromere                    | NA                                |                                                     |                        |
| zC036C22  | 1                                | 1                               | 1                              | NA                | 1                                        | q              | near the centromere                    | 1                                 | 47613827-47822613                                   | 2 BAC Ends             |
| zC022O06  | 1                                | 1                               | 1                              | NA                | 1                                        | q              | near the centromere                    | 1                                 | 47741705-47926482                                   | 2 BAC Ends             |
| zC154P06  | 1 and 18                         | 1 and 5                         | NA                             | NA                | 1                                        | q              | medial                                 | 1 and 18                          | chr1: 53652167-53665436<br>chr 18:32872567-32885761 | 1 BAC End<br>1 BAC End |
| zK242H09  | 18                               | NA                              | 18                             | 18                | 1                                        | q              | medial                                 | 18                                | 19587551-19600710                                   | 1 BAC End              |
| zC196H16  | 1                                | 1                               | 1                              | 1                 | 1                                        | q              | subtelomeric                           | 1                                 | 64718027-64947507<br>64718027-64949097              | 2 BAC Ends             |
| zC141F18  | 1                                | 1                               | 1                              | NA                | 1                                        | q              | telomeric                              | 1                                 | 65198428-65354961                                   | 2 BAC Ends             |
| zC169P22  | 1                                | 1 and 19                        | NA                             | NA                | 1                                        | q              | telomeric                              | 1                                 | 65203867-65340024                                   | 2 BAC Ends             |
| zK014G06  | 11                               | NA                              | NA                             | NA                | 2                                        | p              | telomeric                              | 2                                 | 2757028-2770178                                     | 1 BAC End              |
| zC243A15  | NA                               | NA                              | 2                              | 2                 | 2                                        | p              | medial                                 | NA                                |                                                     |                        |

|           |         |              |    |    |   |   |                     |    |                                        |            |
|-----------|---------|--------------|----|----|---|---|---------------------|----|----------------------------------------|------------|
| zK228I19  | NA      | NA           | 2  | NA | 2 | p | near the centromere | NA |                                        |            |
| zK063K07  | NA      | NA           | 2  | 2  | 2 | p | near the centromere | NA |                                        |            |
| zC220P06  | 2       | 2            | 2  | NA | 2 | q | near the centromere | 2  | 13684547-13911816                      | 2 BAC Ends |
| zK127K09  | 2       | NA           | 2  | NA | 2 | q | near the centromere | 2  | 13880704-14051063                      | 2 BAC Ends |
| zK021K10  | 2       | NA           | 2  | 2  | 2 | q | near the centromere | 2  | 14223917-14471712                      | 2 BAC Ends |
| zC039P05  | 2       | 2            | 2  | NA | 2 | q | near the centromere | 2  | 15278821-15292131<br>61286485-61299784 | 1 BAC End  |
| zC177G10  | 2       | 2, 6, and 7  | NA | NA | 2 | q | near the centromere | 2  | 20406718-20419979                      | 1 BAC End  |
| zK058B18  | 2       | NA           | 2  | 2  | 2 | q | near the centromere | NA |                                        |            |
| zK074F15  | NA      | NA           | 2  | 2  | 2 | q | near the centromere | NA |                                        |            |
| zC117K11  | 2       | 2            | 2  | NA | 2 | q | proximal            | 2  | 14901387-15071575                      | 2 BAC Ends |
| zC057G18  | 2       | 2            | 2  | 2  | 2 | q | proximal            | 2  | 16314770-16489662                      | 2 BAC Ends |
| zK236A14  | 2 and 7 | NA           | 2  | 2  | 2 | q | proximal            | 2  | 16970863-16984201                      | 1 BAC End  |
| zK024C02  | 2       | NA           | 2  | 2  | 2 | q | proximal            | 2  | 20905911-20919059                      | 1 BAC End  |
| zK149I17  | 2       | NA           | 2  | 2  | 2 | q | proximal            | 2  | 21950811-22184552<br>21972870-22184552 | 2 BAC Ends |
| zC236G22  | 14      | 14           | NA | NA | 2 | q | proximal            | 14 | 28960800-29113654                      | 2 BAC Ends |
| zC218C08  | 2       | 2            | NA | 2  | 2 | q | medial              | 2  | 15999595-16198095                      | 2 BAC Ends |
| zKp099C04 | 2       | 2            | 2  | NA | 2 | q | medial              | 2  | 19623792-19636974<br>21597388-21610643 | 1 BAC End  |
| zK261L02  | 2       | NA           | 2  | 2  | 2 | q | medial              | 2  | 19765037-19949626                      | 2 BAC Ends |
| zK005I22  | 2       | NA           | 2  | 2  | 2 | q | medial              | 2  | 19947571-20157601                      | 2 BAC Ends |
| zK218H11  | 2       | NA           | 2  | 2  | 2 | q | medial              | 2  | 20110190-20328751                      | 2 BAC Ends |
| zKp093C05 | 2       | 2            | 2  | 2  | 2 | q | medial              | 2  | 20853389-21051983                      | 2 BAC Ends |
| zK223D07  | 2       | NA           | 2  | 2  | 2 | q | medial              | 2  | 21948585-21961835<br>22422427-22435677 | 1 BAC End  |
| zK148A12  | 2       | NA           | 2  | 2  | 2 | q | medial              | 2  | 24618448-24863658                      | 2 BAC Ends |
| zC212M21  | 18      | 2, 8, and 17 | 2  | 2  | 2 | q | medial              | 2  | 28271265-28472689                      | 2 BAC Ends |
| zC106H04  | 2       | 2            | 2  | 2  | 2 | q | medial              | 2  | 28541841-28734733                      | 2 BAC Ends |
| zK125O18  | 2       | NA           | NA | NA | 2 | q | medial              | 2  | 38536675-38726774                      | 2 BAC Ends |
| zK031B10  | 2       | NA           | 2  | 2  | 2 | q | medial              | 2  | 40487801-40704156                      | 2 BAC Ends |
| zC106K21  | 2       | 2            | 2  | 2  | 2 | q | medial              | NA |                                        |            |
| zK077B19  | 2       | NA           | NA | NA | 2 | q | medial              | NA |                                        |            |
| zK216E09  | 2       | NA           | 2  | 2  | 2 | q | distal              | 2  | 27889759-28082345                      | 2 BAC Ends |
| zC096I07  | 15      | 2            | 2  | 2  | 2 | q | distal              | 2  | 38914173-38927435                      | 1 BAC End  |
| zC265G22  | 2       | 2            | 2  | 2  | 2 | q | distal              | 2  | 46760071-46773508                      | 1 BAC End  |
| zC057G11  | 2       | 2            | 2  | NA | 2 | q | distal              | 2  | 50539656-50552952                      | 1 BAC End  |
| zC137C04  | 8       | 2            | NA | 2  | 2 | q | subtelomeric        | 2  | 60326515-60339795                      | 1 BAC End  |
| zC009D09  | 9       | 2            | 2  | 2  | 2 | q | telomeric           | 2  | 55415046-55428047                      | 1 BAC End  |
| zK007C07  | 15      | NA           | NA | NA | 3 | p | telomeric           | 3  | 61907519-62124553                      | 2 BAC Ends |

|           |          |         |    |    |   |   |                                         |         |                                                    |                        |
|-----------|----------|---------|----|----|---|---|-----------------------------------------|---------|----------------------------------------------------|------------------------|
| zC196B14  | 3        | 3       | 3  | 3  | 3 | p | subtelomeric                            | 3       | 59114796-59308455                                  | 2 BAC Ends             |
| zK188H10  | NA       | NA      | 3  | 3  | 3 | p | medial                                  | 3       | 58898120-58911362                                  | 1 BAC End              |
| zC220A02  | 3        | 3 and 7 | 3  | NA | 3 | p | proximal                                | 3 and 7 | chr 3: 6812707-6825787<br>chr 7: 72830073-72843153 | 1 BAC End<br>1 BAC End |
| zK167C09  | 15       | NA      | 3  | 3  | 3 | p | pericentric<br>inversion in AB to<br>3q | 3       | 58518799-58671242                                  | 2 BAC Ends             |
| zC115J06  | 3        | 3       | NA | NA | 3 | q | near the centromere                     | NA      |                                                    |                        |
| zC136A14  | 3        | 3       | 3  | 3  | 3 | q | proximal                                | 3       | 49382791-49551157                                  | 2 BAC Ends             |
| zK183N06  | 3 and 6  | NA      | 3  | 3  | 3 | q | proximal                                | 3       | 19791040-20000784                                  | 2 BAC Ends             |
| zC195G24  | 22       | 22      | 3  | 3  | 3 | q | proximal                                | 22      | 26533406-26546695                                  | 1 BAC End              |
| zK043P13  | NA       | NA      | 3  | 3  | 3 | q | proximal                                | NA      |                                                    |                        |
| zK108H08  | 24       | NA      | 3  | 3  | 3 | q | proximal                                | NA      |                                                    |                        |
| zC256M01  | 3        | 3       | 3  | 3  | 3 | q | medial                                  | 3       | 29372287-29528745                                  | 2 BAC Ends             |
| zC069D20  | 3        | 3       | 3  | NA | 3 | q | medial                                  | 3       | 29318386-29502357                                  | 2 BAC Ends             |
| zK271F03  | 3        | NA      | 3  | 3  | 3 | q | medial                                  | 3       | 29114886-29128092                                  | 1 BAC End              |
| zK077J09  | 7 and 17 | NA      | 3  | NA | 3 | q | medial                                  | 7       | 23445416-23632061                                  | 2 BAC Ends             |
| zKp021H04 | NA       | NA      | 3  | 3  | 3 | q | medial                                  | NA      |                                                    |                        |
| zK178D09  | 3 and 23 | NA      | 3  | 3  | 3 | q | distal                                  | 3       | 22856698-23012289                                  | 2 BAC Ends             |
| zK197E21  | 3        | NA      | 3  | NA | 3 | q | distal                                  | 3       | 15633176-15839847                                  | 2 BAC Ends             |
| zC246E12  | NA       | NA      | 3  | NA | 3 | q | distal                                  | NA      |                                                    |                        |
| zK061N16  | NA       | NA      | 3  | 3  | 3 | q | distal                                  | NA      |                                                    |                        |
| zC122F08  | U        | 3       | 3  | NA | 3 | q | subtelomeric                            | 3       | 67599924-67817005                                  | 2 BAC Ends             |
| zK006B11  | U        | NA      | 3  | NA | 3 | q | subtelomeric                            | 3       | 65818529-65995191                                  | 2 BAC Ends             |
| zC201B09  | U        | 3       | 3  | 3  | 3 | q | subtelomeric                            | 3       | 65722937-65914853                                  | 2 BAC Ends             |
| zC253B18  | 11       | 3       | 3  | 3  | 3 | q | subtelomeric                            | 3       | 3944043-3957172                                    | 1 BAC End              |
| zK005H01  | 3        | NA      | NA | NA | 3 | q | subtelomeric                            | 3       | 1010048-1023155                                    | 1 BAC End              |
| zC274J07  | 15       | 3       | 3  | 3  | 3 | q | subtelomeric                            | NA      |                                                    |                        |
| zC012P12  | 6        | 6       | 3  | NA | 3 | q | telomeric                               | 3       | 3345534-3358766                                    | 1 BAC End              |
| zK030G05  | 3        | NA      | 3  | 3  | 3 | q | telomeric                               | 3       | 1237564-1470750                                    | 2 BAC Ends             |
| zC262N01  | 4        | 4       | NA | 4  | 4 | p | telomeric                               | 4       | 46297923-46311356                                  | 1 BAC End              |
| zK030C13  | 18       | NA      | NA | NA | 4 | p | telomeric                               | 18      | 41489856-41502975                                  | 1 BAC End              |
| zC132P20  | 4        | 4       | 4  | 4  | 4 | p | subtelomeric                            | 4       | 1265901-1445384                                    | 2 BAC Ends             |
| zC240J22  | 4        | 4 and 5 | 4  | 4  | 4 | p | subtelomeric                            | 4       | 4737249-4909691                                    | 2 BAC Ends             |
| zK014D08  | 4        | NA      | 4  | 4  | 4 | p | subtelomeric                            | 4       | 4998249-5262388                                    | 2 BAC Ends             |
| zK201E17  | 4        | NA      | 4  | NA | 4 | p | subtelomeric                            | 4       | 5766241-5779510                                    | 1 BAC End              |
| zC276H18  | 4        | 4       | 4  | NA | 4 | p | subtelomeric                            | 4       | 8905645-8919023                                    | 1 BAC End              |
| zK153K10  | 4        | NA      | 4  | 4  | 4 | p | subtelomeric                            | 4       | 12283944-12466480                                  | 2 BAC Ends             |
| zK061F09  | 4        | NA      | 4  | 24 | 4 | p | subtelomeric                            | NA      |                                                    |                        |
| zK021H14  | 4        | NA      | 4  | 4  | 4 | p | distal                                  | 4       | 8419099-8638977                                    | 2 BAC Ends             |
| zK222F08  | 4        | NA      | 4  | 4  | 4 | p | distal                                  | 4       | 9301552-9509460                                    | 2 BAC Ends             |

|          |                 |                     |    |    |   |   |                        |          |                                               |                          |
|----------|-----------------|---------------------|----|----|---|---|------------------------|----------|-----------------------------------------------|--------------------------|
| zC239E06 | NA              | NA                  | 4  | 4  | 4 | p | distal                 | NA       |                                               |                          |
| zK244B23 | 4               | NA                  | 4  | 4  | 4 | p | medial                 | 4        | 13375433-13571220                             | 2 BAC Ends               |
| zK180P18 | 4               | NA                  | 4  | 4  | 4 | p | medial                 | 4        | 16351073-16572320                             | 2 BAC Ends               |
| zC132J14 | 4               | 4                   | NA | NA | 4 | p | proximal               | 4        | 14480200-14480908                             | T51 RH Map               |
| zK097C07 | 4               | NA                  | 4  | 4  | 4 | p | proximal               | 4        | 32310830-32324182                             | 1 BAC End                |
| zC092L17 | 4               | 4                   | 4  | 4  | 4 | p | near the centromere    | 4        | 17086785-17100038                             | 1 BAC End                |
| zC260P03 | 4               | 4                   | 4  | 4  | 4 | p | near the centromere    | 4        | 18942123-19123022                             | 2 BAC Ends               |
| zK266P18 | 4               | NA                  | 4  | NA | 4 | p | near the centromere    | 4        | 20774444-20787667                             | 1 BAC End                |
| zK066D18 | 4               | NA                  | 4  | 4  | 4 | p | near the centromere    | 4        | 33728956-33902772                             | 2 BAC Ends               |
| zK210E13 | 4               | NA                  | 4  | NA | 4 | p | near the centromere    | 4        | 33993532-34215037                             | 2 BAC Ends               |
| zC242E19 | NA              | 14                  | NA | U  | 4 | p | near the centromere    | NA       |                                               |                          |
| zC149P05 | 4               | 4                   | 4  | 4  | 4 | q | near the centromere    | 4        | 32064870-32078129                             | 1 BAC End                |
| zK009A20 | 4               | NA                  | 4  | 4  | 4 | q | near the centromere    | 4        | 33006299-33230093                             | 2 BAC Ends               |
| zC091G03 | 4               | 4                   | 4  | 4  | 4 | q | near the centromere    | 4        | 33583684-33758324                             | 2 BAC Ends               |
| zK043F09 | 4               | NA                  | NA | 4  | 4 | q | heterochromatic region | 4        | 35578924-35735588                             | 2 BAC Ends               |
| zC128F02 | 15              | 4                   | NA | NA | 4 | q | heterochromatic region | 4        | 37627935-37795193                             | 2 BAC Ends               |
| zC199M09 | 14              | 4, 5, 13,<br>and 16 | 14 | 14 | 4 | q | heterochromatic region | 4        | 41492210-41505320                             | 1 BAC End                |
| zC207E19 | 4               | 3 and 4             | 4  | 4  | 4 | q | heterochromatic region | 4        | 41837915-42054373                             | 2 BAC Ends               |
| zK237G15 | 5, 8, and<br>10 | NA                  | 4  | 4  | 4 | q | heterochromatic region | 4        | 45630303-45643723                             | 1 BAC End                |
| zC039D08 | 3 and U         | 3                   | NA | U  | 4 | q | heterochromatic region | 3 and U  | chr 3: 70199481-70212777                      | 1 BAC End                |
|          |                 |                     |    |    |   |   |                        |          | chr U: 15585436-15598732<br>15735130-15748438 | 1 BAC End                |
| zK014O06 | U               | NA                  | 3  | 3  | 4 | q | heterochromatic region | 3        | 70292200-70526076                             | 2 BAC Ends               |
| zK026M03 | 5 and 23        | NA                  | NA | 5  | 4 | q | heterochromatic region | 5        | 43808864-43963922                             | 2 BAC Ends               |
| zK169L05 | U               | NA                  | 4  | NA | 4 | q | heterochromatic region | 6 and 21 | chr 6: 9203223-9316482                        | 2 BAC Ends               |
|          |                 |                     |    |    |   |   |                        |          | chr 21: 49428636-4942923<br>1258781-1488424   | T51 RH Map<br>2 BAC Ends |
| zK020L04 | 4               | NA                  | 12 | NA | 4 | q | heterochromatic region | 12       |                                               |                          |
| zC197F20 | 14              | 14                  | 14 | 14 | 4 | q | heterochromatic region | 14       | 38145844-38344621                             | 2 BAC Ends               |
| zC218H08 | U               | 14                  | 14 | 14 | 4 | q | heterochromatic region | 14       | 42575952-42589232<br>55305423-55318503        | 1 BAC End                |
| zK285E18 | 14              | NA                  | 14 | 14 | 4 | q | heterochromatic region | 14       | 42784590-42947367                             | 2 BAC Ends               |

|          |    |                |    |    |   |   |                        |          |                                                       |                        |
|----------|----|----------------|----|----|---|---|------------------------|----------|-------------------------------------------------------|------------------------|
| zK078O07 | 14 | NA             | 14 | 14 | 4 | q | heterochromatic region | 14       | 52356148-52621658                                     | 2 BAC Ends             |
| zC187D01 | 14 | 14             | 14 | 14 | 4 | q | heterochromatic region | 14       | 56995151-57171235                                     | 2 BAC Ends             |
| zC196H24 | 14 | 14             | 14 | 14 | 4 | q | heterochromatic region | 14       | 59512626-59721463                                     | 2 BAC Ends             |
| zK003P04 | U  | NA             | 14 | 14 | 4 | q | heterochromatic region | 14       | 69585234-69598345                                     | 1 BAC End              |
| zC167J09 | 15 | 15             | 15 | NA | 4 | q | heterochromatic region | 15       | 32398231-32538362                                     | 2 BAC Ends             |
| zK011L18 | 17 | NA             | 17 | 17 | 4 | q | heterochromatic region | 17       | 16190913-16407002                                     | 2 BAC Ends             |
| zC208F21 | 19 | 11, 18, and 19 | 14 | 14 | 4 | q | heterochromatic region | 19       | 42416256-42429550                                     | 1 BAC End              |
| zK165E24 | U  | NA             | NA | U  | 4 | q | heterochromatic region | U        | 17196851-17210208<br>17366292-17379641                | 1 BAC End              |
| zK238O14 | U  | NA             | NA | U  | 4 | q | heterochromatic region | U        | 674456-930935                                         | 2 BAC Ends             |
| bZ009C18 | NA | NA             | NA | 14 | 4 | q | heterochromatic region | NA       |                                                       |                        |
| zC271G18 | NA | 7, 9, and 12   | NA | U  | 4 | q | heterochromatic region | NA       |                                                       |                        |
| zK082I20 | NA | NA             | NA | U  | 4 | q | heterochromatic region | NA       |                                                       |                        |
| zC079A18 | 15 | 4              | NA | NA | 4 | q | telomeric              | 4        | 37566365-37720847                                     | 2 BAC Ends             |
| zC087E10 | 5  | 5              | 5  | 5  | 5 | p | telomeric              | 5        | 75518198-75518629                                     | T51 RH Map             |
| zK002E19 | 5  | NA             | NA | NA | 5 | p | subtelomeric           | 5        | 67688527-67928972                                     | 2 BAC Ends             |
| zK020J10 | 5  | NA             | 5  | 5  | 5 | p | distal                 | NA       |                                                       |                        |
| zK208B17 | 5  | NA             | 5  | NA | 5 | p | distal                 | NA       |                                                       |                        |
| zK007J10 | U  | NA             | 5  | NA | 5 | p | medial                 | 5        | 77840283-77853421                                     | 1 BAC End              |
| zK007B18 | 5  | NA             | NA | NA | 5 | q | near the centromere    | 5        | 46977693-47128275                                     | 2 BAC Ends             |
| zC077G09 | 5  | 5              | 5  | NA | 5 | q | proximal               | 5        | 42403789-42551945                                     | 2 BAC Ends             |
| zC132M05 | 5  | 5              | NA | NA | 5 | q | medial                 | 5        | 4138088-4309756                                       | 2 BAC Ends             |
| zK125I20 | 5  | NA             | 5  | NA | 5 | q | medial                 | 5        | 32281929-32456100                                     | 2 BAC Ends             |
| zC117M20 | 5  | 5              | 5  | 17 | 5 | q | medial                 | 5        | 28392741-28571146                                     | 2 BAC Ends             |
| zC114C12 | 5  | 5              | 5  | 5  | 5 | q | medial                 | 5        | 16102499-16260537                                     | 2 BAC Ends             |
| zK035I22 | 5  | NA             | 5  | 5  | 5 | q | medial                 | NA       |                                                       |                        |
| zC001E03 | 5  | 5              | NA | NA | 5 | q | distal                 | 5        | 41906019-42082255                                     | 2 BAC Ends             |
| zK061N21 | U  | NA             | 5  | NA | 5 | q | distal                 | 22 and U | chr 22: 30049270-30062364<br>chr U: 48876881-48889971 | 1 BAC End<br>1 BAC End |
| zK210G19 | 5  | NA             | 5  | 5  | 5 | q | subtelomeric           | 5        | 50872193-51123587                                     | 2 BAC Ends             |
| zC207K07 | NA | NA             | NA | NA | 5 | q | subtelomeric           | NA       |                                                       |                        |
| zC150K20 | 8  | 5 and 7        | 5  | NA | 5 | q | telomeric              | 5        | 1507291-1520533                                       | 1 BAC End              |

|          |          |                   |    |    |   |   |                     |          |                                                       |                        |
|----------|----------|-------------------|----|----|---|---|---------------------|----------|-------------------------------------------------------|------------------------|
| zK023D07 | 6        | NA                | 6  | 6  | 6 | p | medial              | 6        | 11471266-11687049                                     | 2 BAC Ends             |
| zC127M10 | 6        | 6                 | 6  | 6  | 6 | p | proximal            | 6        | 4251867-4438662                                       | 2 BAC Ends             |
| zC186M12 | 16       | NA                | 6  | 6  | 6 | p | proximal            | NA       |                                                       |                        |
| zK011H02 | 6        | NA                | 6  | 6  | 6 | p | proximal            | NA       |                                                       |                        |
| zC210N21 | 6        | 6                 | NA | NA | 6 | p | near the centromere | 15       | 57312283-57474348                                     | 2 BAC Ends             |
| zC122J16 | 14       | 14, 17,<br>and 25 | 14 | 1  | 6 | q | near the centromere | 14       | 55842747-56015589                                     | 2 BAC Ends             |
| zC002A23 | U        | U                 | NA | U  | 6 | q | near the centromere | U        | 13999754-14170910                                     | 2 BAC Ends             |
| zC207G04 | NA       | NA                | NA | U  | 6 | q | near the centromere | NA       |                                                       |                        |
| zK210O07 | 25       | NA                | 6  | 6  | 6 | q | proximal            | 6        | 49699243-49712539                                     | 1 BAC End              |
| zK038M05 | 6        | NA                | 6  | 6  | 6 | q | proximal            | NA       |                                                       |                        |
| zC223I03 | 6        | 6                 | 6  | NA | 6 | q | medial              | NA       |                                                       |                        |
| zK148L02 | 17       | NA                | 6  | 6  | 6 | q | distal              | 6        | 37986472-38178432                                     | 2 BAC Ends             |
| zC060H08 | U        | 6                 | NA | NA | 6 | q | subtelomeric        | 6        | 64385164-64547964                                     | 2 BAC Ends             |
| zK166J19 | 16       | NA                | 6  | NA | 6 | q | telomeric           | 16       | 48632997-48646230                                     | 1 BAC End              |
| zK009M06 | 7        | NA                | NA | NA | 7 | p | telomeric           | 7        | 81423473-81424057                                     | T51 RH Map             |
| zC139O04 | NA       | 13                | NA | U  | 7 | p | subtelomeric        | NA       |                                                       |                        |
| zC251B22 | NA       | 7                 | 7  | 7  | 7 | p | subtelomeric        | NA       |                                                       |                        |
| zK046I09 | 7        | NA                | 7  | NA | 7 | p | medial              | 7        | 83011172-83235010                                     | 2 BAC Ends             |
| zC219K13 | 7        | 7                 | 7  | NA | 7 | p | near the centromere | NA       |                                                       |                        |
| zC069P21 | 7        | 3 and 7           | 7  | 7  | 7 | q | near the centromere | 7        | 58557812-58721634                                     | 2 BAC Ends             |
| zK014N10 | 7        | NA                | NA | NA | 7 | q | near the centromere | 7        | 53070009-53309139                                     | 2 BAC Ends             |
| zC113K19 | NA       | NA                | 7  | 7  | 7 | q | near the centromere | NA       |                                                       |                        |
| zK090B24 | 7        | NA                | 7  | NA | 7 | q | near the centromere | NA       |                                                       |                        |
| zC150J10 | 7        | 7 and 11          | 7  | 7  | 7 | q | medial              | 7 and 11 | chr 7: 36458590-36471865<br>chr 11: 21346088-21359066 | 1 BAC End<br>1 BAC End |
| zC251J08 | 7        | 7                 | 7  | 7  | 7 | q | medial              | 7        | 36832720-36845803                                     | 1 BAC End              |
| zK249N13 | 7        | NA                | 7  | NA | 7 | q | medial              | 7        | 36978381-36991760                                     | 1 BAC End              |
| zK265M08 | 7        | NA                | 7  | NA | 7 | q | subtelomeric        | 7        | 15384731-15554024                                     | 2 BAC Ends             |
| zC209N17 | NA       | NA                | NA | U  | 7 | q | telomeric           | NA       |                                                       |                        |
| zC128L16 | 7        | 7                 | NA | NA | 7 | q | telomeric           | 7        | 1387156-1400357                                       | 1 BAC End              |
| zC212I24 | 7        | 7                 | 7  | 7  | 7 | q | telomeric           | 7        | 455951-469215                                         | 1 BAC End              |
| zC261I17 | U        | U                 | NA | U  | 7 | q | telomeric           | U        | 7933272-8107445                                       | 2 BAC Ends             |
| zK016N15 | 8        | NA                | 8  | 8  | 8 | p | telomeric           | 8        | 64875251-65092668                                     | 2 BAC Ends             |
| zC057O07 | 8        | 8                 | 8  | NA | 8 | p | telomeric           | 8        | 64775008-64949315                                     | 2 BAC Ends             |
| zC069A12 | 8        | 8                 | 8  | NA | 8 | p | telomeric           | 8        | 56536959-56837752                                     | 2 BAC Ends             |
| zK220O05 | 8 and 20 | NA                | NA | 8  | 8 | p | telomeric           | 8 and 20 | chr 8: 51932153-51945630<br>chr 20: 43012365-43025703 | 1 BAC End<br>1 BAC End |
| zC080A15 | 8        | 8                 | 8  | 8  | 8 | p | distal              | 8        | 15923971-15937163                                     | 1 BAC End              |
| zK067I21 | 8        | NA                | 8  | NA | 8 | p | near the centromere | 8        | 48979468-48992522                                     | 1 BAC End              |
| zC255F14 | NA       | NA                | 8  | 8  | 8 | p | near the centromere | NA       |                                                       |                        |

|          |                   |           |    |    |    |   |                     |                   |                                                                                     |                                     |
|----------|-------------------|-----------|----|----|----|---|---------------------|-------------------|-------------------------------------------------------------------------------------|-------------------------------------|
| zC103G04 | 8                 | 7 and 8   | NA | NA | 8  | q | near the centromere | 8                 | 27341164-27354413<br>27754804-27768077                                              | 1 BAC End                           |
| zC106G04 | 8                 | 8         | 8  | 8  | 8  | q | proximal            | 8                 | 31551090-31742063                                                                   | 2 BAC Ends                          |
| zC163L21 | 8                 | 8         | 8  | 8  | 8  | q | proximal            | 8                 | 26998281-27011372                                                                   | 1 BAC End                           |
| zK283N20 | 20                | NA        | 20 | 20 | 8  | q | medial              | 20                | 39503626-39648349                                                                   | 2 BAC Ends                          |
| zK014L10 | 8                 | NA        | 8  | NA | 8  | q | medial              | 10                | 21964251-22306546                                                                   | 2 BAC Ends                          |
| zK188E21 | NA                | NA        | 20 | 20 | 8  | q | medial              | NA                |                                                                                     |                                     |
| zC269M15 | 8                 | 8         | 8  | 8  | 8  | q | distal              | 8                 | 27677838-27818484                                                                   | 2 BAC Ends                          |
| zC027L17 | 8                 | 8 and 18  | NA | NA | 8  | q | subtelomeric        | 8                 | 13333796-13347073                                                                   | 1 BAC End                           |
| zK149F22 | 8                 | NA        | 8  | 8  | 8  | q | telomeric           | 8 and 10          | chr 8: 56961312-56974658<br>chr 10: 16685649-16698995                               | 1 BAC End<br>1 BAC End              |
| zK049H09 | 8                 | NA        | 8  | 8  | 8  | q | telomeric           | 8                 | 828816-1040252                                                                      | 2 BAC Ends                          |
| zC115B08 | 9                 | 9         | 9  | NA | 9  | p | telomeric           | 9                 | 3840695-3853990<br>4229898-4243637                                                  | 1 BAC End                           |
| zC166E11 | 13, 19,<br>and 20 | 19 and 20 | 9  | NA | 9  | p | telomeric           | 13, 19, and<br>20 | chr 13: 32063634-32076929<br>chr 19: 34016152-34029427<br>chr 20: 61597942-61611225 | 1 BAC End<br>1 BAC End<br>1 BAC End |
| zK249G23 | NA                | NA        | 9  | 9  | 9  | p | distal              | 9                 | 3211227-3224688                                                                     | 1 BAC End                           |
| zC067P04 | NA                | 9         | 9  | NA | 9  | p | distal              | 9                 | 7024085-7202223                                                                     | 2 BAC Ends                          |
| zC121J05 | 9                 | 9         | 9  | 9  | 9  | p | distal              | 9                 | 7029022-7042325                                                                     | 1 BAC End                           |
| zK120M04 | 9                 | NA        | 9  | 9  | 9  | p | proximal            | 9                 | 7572965-7781353                                                                     | 2 BAC Ends                          |
| zK001A09 | 9                 | NA        | NA | NA | 9  | q | near the centromere | 9                 | 12737861-12986999                                                                   | 2 BAC Ends                          |
| zC212N06 | 9 and 11          | 9         | 9  | 9  | 9  | q | near the centromere | 9                 | 16985534-17290962                                                                   | 2 BAC Ends                          |
| zC173O04 | 1 and 17          | 9         | 9  | NA | 9  | q | proximal            | 9                 | 15765894-15947715                                                                   | 2 BAC Ends                          |
| zK179E14 | 7                 | NA        | 9  | NA | 9  | q | proximal            | NA                |                                                                                     |                                     |
| zC004P07 | 9                 | 9         | NA | NA | 9  | q | medial              | 9                 | 31120151-31133418                                                                   | 1 BAC End                           |
| zK025L23 | 9                 | NA        | 9  | 9  | 9  | q | medial              | 9                 | 35078811-35314831<br>35079624-35314831                                              | 2 BAC Ends                          |
| zC085P24 | 9                 | 9         | 9  | NA | 9  | q | distal              | 9                 | 25869080-25882314                                                                   | 1 BAC End                           |
| zC165B19 | 9                 | 9         | 9  | 9  | 9  | q | distal              | 9                 | 29705084-30050905<br>29876195-30050905                                              | 2 BAC Ends                          |
| zK255G14 | NA                | NA        | 9  | NA | 9  | q | distal              | NA                |                                                                                     |                                     |
| zC012N08 | 11                | 9         | 19 | 9  | 9  | q | telomeric           | 9                 | 51550658-51563901<br>51736420-51749663                                              | 1 BAC End                           |
| zC066E19 | U                 | 14        | 9  | 9  | 9  | q | telomeric           | U                 | 2561846-2724314                                                                     | 2 BAC Ends                          |
| zC133D02 | 5 and 23          | 10        | 10 | 10 | 10 | p | telomeric           | 10                | 269080-432849                                                                       | 2 BAC Ends                          |
| zC128P08 | 10                | 10        | NA | NA | 10 | p | telomeric           | 10                | 272675-273165                                                                       | T51 RH Map                          |
| zC242F23 | 15                | 1 and 10  | 10 | NA | 10 | p | telomeric           | 1 and 10          | chr 10: 2516177-2529347<br>chr 1: 66508224-66521481                                 | 1 BAC End<br>1 BAC End              |
| zK024N17 | U                 | NA        | 10 | 10 | 10 | p | telomeric           | 10                | 4774567-4787656                                                                     | 1 BAC End                           |

|          |           |          |    |    |    |   |                     |                |                                                |            |
|----------|-----------|----------|----|----|----|---|---------------------|----------------|------------------------------------------------|------------|
| zC093H16 | U         | 9 and 10 | 10 | 10 | 10 | p | telomeric           | 10             | 4935623-4948940                                | 1 BAC End  |
| zK171L20 | 9 and 10  | NA       | 10 | NA | 10 | p | telomeric           | 10             | 48893995-49106495                              | 2 BAC Ends |
| zK224O08 | NA        | NA       | 10 | NA | 10 | p | telomeric           | NA             |                                                |            |
| zC197A16 | 10        | 10       | 10 | NA | 10 | p | medial              | 10             | 9207989-9404988                                | 2 BAC Ends |
| zK030A08 | 10        | NA       | NA | NA | 10 | p | medial              | 10             | 10123547-10332196                              | 2 BAC Ends |
| zC043O18 | 8         | 14       | NA | NA | 10 | p | proximal            | 14             | 7200721-7214143                                | 1 BAC End  |
| zK047C08 | 10 and 23 | NA       | 23 | NA | 10 | p | proximal            | 23             | 19470951-19484524                              | 1 BAC End  |
| zC136O04 | 10        | 10       | 10 | 10 | 10 | q | near the centromere | 10             | 17320034-17333302                              | 1 BAC End  |
| zK003B23 | 10        | NA       | 10 | NA | 10 | q | near the centromere | NA             |                                                |            |
| zC149N01 | 10        | 10       | 10 | NA | 10 | q | medial              | 10             | 21969495-21982757                              | 1 BAC End  |
| zK056F11 | 10        | NA       | 10 | NA | 10 | q | medial              | 10             | 26675763-26689052                              | 1 BAC End  |
| zK161J10 | NA        | NA       | 10 | 10 | 10 | q | medial              | NA             |                                                |            |
| zC135J07 | 10        | 10       | 10 | 10 | 10 | q | distal              | 10             | 41455896-41640209                              | 2 BAC Ends |
| zK016F21 | 5         | NA       | 10 | 10 | 10 | q | subtelomeric        | 10             | 38651220-38664339<br>39166105-39179295         | 1 BAC End  |
| zC022E09 | 10        | 10       | 10 | NA | 10 | q | telomeric           | 10             | 45339834-45353078                              | 1 BAC End  |
| zC159E12 | 1 and 22  | 11       | 11 | 11 | 11 | p | telomeric           | NA             |                                                |            |
| zK113M09 | 11        | NA       | 11 | NA | 11 | p | subtelomeric        | 11             | 3967064-3982579<br>6269256-6282578             | 1 BAC End  |
| zC108O08 | 11        | 11       | NA | NA | 11 | p | subtelomeric        | 11             | 4304693-4492412                                | 2 BAC Ends |
| zC270L17 | NA        | 11       | NA | 11 | 11 | p | subtelomeric        | NA             |                                                |            |
| zK008J21 | 11        | NA       | NA | NA | 11 | p | near the centromere | 11, 14, and 15 | chr 11: 7710723-7713378                        | T51 RH Map |
|          |           |          |    |    |    |   |                     |                | chr 14: 7655889-7669030                        | 1 BAC End  |
|          |           |          |    |    |    |   |                     |                | chr 15: 21033550-21046667<br>21348107-21361224 | 1 BAC End  |
| zK015K08 | 11        | NA       | NA | NA | 11 | p | near the centromere | 11             | 12463167-12476269<br>13084746-13097893         | 1 BAC End  |
| zK014H17 | 11        | NA       | 11 | NA | 11 | q | near the centromere | 2 and 11       | chr 11: 17450218-17463410                      | 1 BAC End  |
|          |           |          |    |    |    |   |                     |                | chr 2: 60976060-60989206                       | 1 BAC End  |
| zC042L14 | 11        | 6 and 11 | NA | NA | 11 | q | near the centromere | 6 and 11       | chr 11: 19858955-19872247                      | 1 BAC End  |
|          |           |          |    |    |    |   |                     |                | chr 6: 16151829-16165096                       | 1 BAC End  |
| zC086H15 | 11        | 11       | 11 | 11 | 11 | q | near the centromere | 11             | 21613791-21627048                              | 1 BAC End  |
| zC118E09 | 11        | 11       | 11 | NA | 11 | q | near the centromere | 11             | 23309557-23322825<br>23784252-23797513         | 1 BAC End  |
| zK029P20 | 11        | NA       | 11 | NA | 11 | q | proximal            | 11             | 25981060-25994193<br>26637522-26650665         | 1 BAC End  |
| zC267N08 | NA        | U        | NA | NA | 11 | q | proximal            | NA             |                                                |            |
| zK029F02 | 11        | NA       | 11 | 11 | 11 | q | proximal            | NA             |                                                |            |
| zK189A09 | 11        | NA       | 11 | 11 | 11 | q | medial              | 11             | 30699723-30712930                              | 1 BAC End  |
| zC107E16 | 11        | 11       | 11 | 11 | 11 | q | medial              | 11             | 32419412-32574159                              | 2 BAC Ends |



|          |    |    |    |    |    |   |                     |           |                                                    |                        |
|----------|----|----|----|----|----|---|---------------------|-----------|----------------------------------------------------|------------------------|
| zK111H12 | 11 | NA | 11 | NA | 11 | q | medial              | NA        |                                                    |                        |
| zK013A21 | 11 | NA | 11 | NA | 11 | q | distal              | 11        | 26116159-26129275                                  | 1 BAC End              |
| zC171E12 | 11 | 11 | 11 | NA | 11 | q | subtelomeric        | 11        | 42855790-42996502                                  | 2 BAC Ends             |
| zC153M01 | 11 | 11 | NA | 11 | 11 | q | subtelomeric        | 11        | 6499169-6667126<br>6501295-6667126                 | 2 BAC Ends             |
| zK202E22 | NA | NA | 11 | 11 | 11 | q | subtelomeric        | NA        |                                                    |                        |
| zC115I06 | 11 | 11 | NA | NA | 11 | q | telomeric           | 11        | 46876389-47031952<br>46876389-47034560             | 2 BAC Ends             |
| zC266K22 | 14 | 14 | 11 | 11 | 11 | q | telomeric           | 14        | 76763889-76777255                                  | 1 BAC End              |
| zK208K08 | NA | NA | NA | NA | 11 | q | telomeric           | NA        |                                                    |                        |
| zC121C04 | 12 | 12 | NA | NA | 12 | p | telomeric           | U         | 129605838-129619147                                | 1 BAC End              |
| zC093E11 | 12 | 12 | 12 | 12 | 12 | p | medial              | 12        | 4713843-4880901                                    | 2 BAC Ends             |
| zC093M08 | 12 | 12 | NA | U  | 12 | p | medial              | 12        | 12725634-12738935                                  | 1 BAC End              |
| zK025P11 | 20 | NA | 12 | 12 | 12 | p | medial              | NA        |                                                    |                        |
| zK014I09 | 20 | NA | 20 | 20 | 12 | p | proximal            | 20        | 9773096-9964928                                    | 2 BAC Ends             |
| zK016I05 | 12 | NA | 12 | 12 | 12 | p | proximal            | 12        | 18787218-19011844                                  | 2 BAC Ends             |
| zC176J23 | U  | 12 | 12 | NA | 12 | p | near the centromere | 12        | 55862742-55876003                                  | 1 BAC End              |
| zK021M21 | 12 | NA | 12 | NA | 12 | q | near the centromere | 12        | 24430420-24443538<br>25667949-25681070             | 1 BAC End              |
| zK190E10 | 12 | NA | 14 | U  | 12 | q | near the centromere | 12        | 31768612-32024946<br>31859633-32024946             | 2 BAC Ends             |
| zK022H21 | 12 | NA | NA | NA | 12 | q | near the centromere | NA        |                                                    |                        |
| zC225J11 | 12 | 12 | 12 | NA | 12 | q | proximal            | 12        | 15378316-15481280                                  | 2 BAC Ends             |
| zC244C18 | 12 | 12 | 12 | 12 | 12 | q | proximal            | NA        |                                                    |                        |
| zC192N18 | 12 | 12 | 12 | 12 | 12 | q | medial              | 12        | 23362809-23529950                                  | 2 BAC Ends             |
| zC079A21 | 12 | 12 | 12 | NA | 12 | q | distal              | 12        | 29703056-29716209                                  | 1 BAC End              |
| zC160A03 | 12 | 12 | 12 | 12 | 12 | q | distal              | 12        | 44734569-44905782                                  | 2 BAC Ends             |
| zC086E02 | 3  | 12 | NA | NA | 12 | q | telomeric           | 12        | 49665073-49825676                                  | 2 BAC Ends             |
| zK006L12 | 13 | NA | NA | NA | 13 | p | telomeric           | 13 and 18 | chr 13: 473169-486297<br>chr 18: 55768933-55782015 | 1 BAC End<br>1 BAC End |
| zC250O01 | 13 | 13 | 13 | 13 | 13 | p | telomeric           | 13        | 793689-806954                                      | 1 BAC End              |
| zC101N13 | 13 | 13 | 13 | 13 | 13 | p | telomeric           | 13        | 29124961-29298009                                  | 2 BAC Ends             |
| zC243F03 | NA | NA | 13 | 13 | 13 | p | distal              | NA        |                                                    |                        |
| zK022N17 | 13 | NA | 13 | NA | 13 | p | medial              | 13        | 22474499-22809338                                  | 2 BAC Ends             |
| zK038M12 | 13 | NA | 13 | NA | 13 | p | proximal            | 13        | 29127200-29140342                                  | 1 BAC End              |
| zK158P02 | NA | NA | 13 | 13 | 13 | p | proximal            | NA        |                                                    |                        |
| zK016I06 | 13 | NA | 13 | NA | 13 | p | near the centromere | 13        | 23463134-23672201                                  | 2 BAC Ends             |
| zC206K20 | 13 | 13 | 2  | 13 | 13 | q | proximal            | 13        | 38973361-39322543<br>39166131-39322543             | 2 BAC Ends             |
| zK011L06 | 13 | NA | NA | NA | 13 | q | proximal            | 13        | 41535602-41768155                                  | 2 BAC Ends             |

|          |           |          |    |    |    |   |                     |          |                                                       |                        |
|----------|-----------|----------|----|----|----|---|---------------------|----------|-------------------------------------------------------|------------------------|
| zC202M24 | 13        | 13       | 13 | NA | 13 | q | medial              | 13       | 37670918-37684238                                     | 1 BAC End              |
| zK162B03 | NA        | NA       | 13 | 13 | 13 | q | medial              | NA       |                                                       |                        |
| zK015F17 | NA        | NA       | 13 | 13 | 13 | q | distal              | NA       |                                                       |                        |
| zC232K09 | NA        | 13       | 13 | NA | 13 | q | subtelomeric        | 13       | 18180736-18351259                                     | 2 BAC Ends             |
| zK167E04 | 13        | NA       | 13 | NA | 13 | q | subtelomeric        | 13       | 44928834-45129012                                     | 2 BAC Ends             |
| zK018N13 | 13        | NA       | 13 | NA | 13 | q | subtelomeric        | 13       | 51691753-51704871                                     | 1 BAC End              |
| zC229G14 | 19        | 11       | 9  | 9  | 13 | q | subtelomeric        | 11       | 43632779-43645893                                     | 1 BAC End              |
| zC065J24 | 19        | 13       | NA | NA | 13 | q | telomeric           | 13       | 50118106-50118856                                     | T51 RH Map             |
| zC024F03 | 2 and 13  | 2 and 13 | NA | NA | 13 | q | telomeric           | 2 and 13 | chr 13: 56288803-56302059<br>chr 2: 47652278-47665540 | 1 BAC End<br>1 BAC End |
| zC134I04 | 13        | 13       | NA | NA | 13 | q | telomeric           | 13       | 58903541-59210716                                     | 2 BAC Ends             |
| zC117H14 | 13        | 13       | NA | NA | 13 | q | telomeric           | 13       | 59455129-59468420<br>59808623-59821942                | 1 BAC End              |
| zC030I02 | 13        | 13       | 13 | 13 | 13 | q | telomeric           | 13       | 59467592-59480806<br>59468732-59481945                | 1 BAC End              |
| zC258M18 | 1         | 1        | NA | NA | 13 | q | telomeric           | 1        | 12694677-12708340<br>13056013-13069537                | 1 BAC End              |
| zC189P15 | 1 and 6   | 1 and 6  | NA | NA | 13 | q | telomeric           | 1 and 6  | chr 1: 18705093-18718377<br>chr 6: 6806311-6819595    | 1 BAC End<br>1 BAC End |
| zC234K01 | 2         | 2 and 6  | NA | NA | 13 | q | telomeric           | 2        | 47652266-47665540                                     | 1 BAC End              |
| zK018P03 | 2 and 6   | NA       | NA | NA | 13 | q | telomeric           | 6        | 6808446-6821597                                       | 1 BAC End              |
| zC344P05 | NA        | NA       | NA | NA | 13 | q | telomeric           | NA       |                                                       |                        |
| zC113I09 | NA        | NA       | 11 | 11 | 13 | q | telomeric           | NA       |                                                       |                        |
| zC117N19 | 14        | 14       | NA | NA | 14 | p | telomeric           | 14       | 2011198-2024532<br>2713791-2727076                    | 1 BAC End              |
| zC198I06 | NA        | 14       | 5  | NA | 14 | p | telomeric           | NA       |                                                       |                        |
| zC207O21 | 14        | 14       | 14 | 14 | 14 | p | distal              | 14       | 3088523-3323703                                       | 2 BAC Ends             |
| zC246K16 | NA        | NA       | 14 | NA | 14 | p | distal              | NA       |                                                       |                        |
| zC261F09 | U         | U        | NA | U  | 14 | p | medial              | U        | 7368479-7382147                                       | 1 BAC End              |
| zC194M19 | 14        | 14       | 14 | NA | 14 | p | medial              | NA       |                                                       |                        |
| zK169H01 | 14 and 22 | NA       | 14 | 14 | 14 | p | proximal            | 14       | 15756834-15929925                                     | 2 BAC Ends             |
| zC159I08 | 14        | 14       | 14 | 14 | 14 | p | proximal            | 14       | 19142113-19155387                                     | 1 BAC End              |
| zK170I11 | 14        | NA       | 14 | 14 | 14 | p | near the centromere | 14       | 7439763-7622786                                       | 2 BAC Ends             |
| zC117E17 | 8 and 14  | 14       | NA | NA | 14 | p | near the centromere | 14       | 29784131-29965843                                     | T51 RH Map             |
| zC117I07 | 8 and 14  | 14       | 14 | NA | 14 | q | near the centromere | NA       |                                                       |                        |
| zC125N22 | 14        | 14       | NA | NA | 14 | q | telomeric           | 14       | 84157968-84158959                                     | T51 RH Map             |
| zK077E06 | 15        | NA       | NA | NA | 15 | p | telomeric           | 15       | 4319660-4520645                                       | 2 BAC Ends             |
| zC055C01 | 15        | 15       | NA | NA | 15 | p | telomeric           | 15       | 6586947-6600244<br>7319875-7333164                    | 1 BAC End              |
| zC125H09 | 15        | 15       | NA | NA | 15 | p | medial              | 15       | 21472800-21651124                                     | 2 BAC Ends             |

|          |          |    |    |    |    |   |                     |          |                                                              |                        |
|----------|----------|----|----|----|----|---|---------------------|----------|--------------------------------------------------------------|------------------------|
| zK202L22 | 3 and 13 | NA | NA | NA | 15 | p | near the centromere | 3 and 13 | chr 3: 16103272-16116652<br>chr 13: 54577880-54591216        | 1 BAC End<br>1 BAC End |
| zC132F07 | 15       | 15 | 15 | 15 | 15 | q | near the centromere | 15       | 15628811-15807466                                            | 2 BAC Ends             |
| zC024O10 | 15       | 15 | 15 | 15 | 15 | q | near the centromere | NA       |                                                              |                        |
| zC125M22 | NA       | 6  | 6  | 6  | 15 | q | near the centromere | NA       |                                                              |                        |
| zC120C08 | 15       | 15 | 15 | 15 | 15 | q | near the centromere | 15       | 27510491-27766996                                            | 2 BAC Ends             |
| zK001O01 | 15       | NA | 15 | 15 | 15 | q | proximal            | 15       | 1337915-1562891                                              | 2 BAC Ends             |
| zK257C10 | 15       | NA | 15 | 15 | 15 | q | proximal            | 15       | 31545805-31804299                                            | 2 BAC Ends             |
| zC191A16 | 15       | 15 | 15 | 15 | 15 | q | subtelomeric        | 15       | 51550363-51698204                                            | 2 BAC Ends             |
| zK151P21 | 15       | NA | 15 | 15 | 15 | q | telomeric           | 15       | 33936194-34257286                                            | 2 BAC Ends             |
| zK042L23 | 15       | NA | 15 | NA | 15 | q | telomeric           | 15       | 50261409-50274503                                            | 1 BAC End              |
| zC059M05 | 15       | 15 | NA | NA | 15 | q | telomeric           | 15       | 50588681-50786799                                            | 2 BAC Ends             |
| zK019A16 | 22       | NA | 22 | 22 | 15 | q | telomeric           | 22       | 6439750-6660019                                              | 2 BAC Ends             |
| zC119D19 | 5        | 16 | 16 | 16 | 16 | p | telomeric           | 16       | 9328662-9341914                                              | 1 BAC End              |
| zC127P21 | 13       | 13 | NA | NA | 16 | p | telomeric           | 13       | 36482408-36641865                                            | 2 BAC Ends             |
| zK011F05 | 16       | NA | 16 | 16 | 16 | p | subtelomeric        | 16       | 7569612-7846417                                              | 2 BAC Ends             |
| zK014I07 | 16       | NA | NA | NA | 16 | p | distal              | 16       | 11895536-11908673                                            | 1 BAC End              |
| zC106K04 | 16       | 16 | 16 | NA | 16 | p | medial              | 16       | 11757114-11964371                                            | 2 BAC Ends             |
| zK082O10 | 9        | NA | 16 | NA | 16 | p | medial              | 11       | 16247354-16260641                                            | 1 BAC End              |
| zK053P21 | 16       | NA | 16 | 16 | 16 | p | proximal            | 16       | 28737066-28750400                                            | 1 BAC End              |
| zC175G06 | 16       | 16 | 16 | 16 | 16 | p | proximal            | 16       | 36396657-36538512                                            | 2 BAC Ends             |
| zC132M17 | 16       | 16 | NA | NA | 16 | q | near the centromere | 16       | 28079663-28343689                                            | 2 BAC Ends             |
| zC213B07 | 16       | 16 | 16 | 16 | 16 | q | near the centromere | 16       | 34049577-34062864                                            | 1 BAC End              |
| zC167H02 | 16       | 16 | 16 | 16 | 16 | q | near the centromere | 16       | 3676766-3814241                                              | 2 BAC Ends             |
| zC105C13 | 16       | 16 | 16 | 16 | 16 | q | proximal            | NA       |                                                              |                        |
| zC236O11 | 16       | 16 | 16 | NA | 16 | q | medial              | 16       | 42059420-42072702<br>44390350-49036330<br>44519560-445328323 | 1 BAC End              |
| zK201I06 | 16       | NA | 16 | 16 | 16 | q | medial              | 16       | 49023040-49036330                                            | 1 BAC End              |
| zH070I04 | NA       | NA | 16 | NA | 16 | q | medial              | NA       |                                                              |                        |
| zK034D22 | NA       | NA | 16 | 16 | 16 | q | medial              | NA       |                                                              |                        |
| zK242E21 | 16       | NA | 16 | 16 | 16 | q | distal              | 16       | 49982457-50144220                                            | 2 BAC Ends             |
| zK107O06 | 16       | NA | 16 | 16 | 16 | q | distal              | 16       | 57421371-57434707                                            | 1 BAC End              |
| zK255N06 | 16       | NA | 16 | 16 | 16 | q | subtelomeric        | 16       | 47456229-47692912                                            | 2 BAC Ends             |
| zK014E01 | U        | NA | NA | U  | 16 | q | subtelomeric        | U        | 16301578-16314719                                            | 1 BAC End              |
| zK246M23 | 15       | NA | 16 | NA | 16 | q | telomeric           | 16       | 56833579-57022084                                            | 2 BAC Ends             |
| zC121P03 | 9        | 11 | NA | NA | 16 | q | telomeric           | 16       | 61408707-61409075                                            | T51 RH Map             |
| zK013L17 | 17       | NA | NA | NA | 17 | p | telomeric           | 17       | 61034178-61047182                                            | 1 BAC End              |
| zC018F08 | U        | 17 | NA | NA | 17 | p | medial              | 17       | 58730073-58812259                                            | 2 BAC Ends             |
| zK006P15 | 17       | NA | NA | NA | 17 | q | near the centromere | 17       | 42580390-42744764                                            | T51 RH Map             |

|           |           |                      |    |    |    |   |                     |    |                                        |                          |
|-----------|-----------|----------------------|----|----|----|---|---------------------|----|----------------------------------------|--------------------------|
| zC195B21  | NA        | NA                   | 17 | 17 | 17 | q | near the centromere | NA |                                        |                          |
| zK014B13  | 17        | NA                   | NA | NA | 17 | q | proximal            | 17 | 324810-337877                          | 1 BAC End                |
| zK170L10  | NA        | NA                   | 17 | 17 | 17 | q | proximal            | NA |                                        |                          |
| zC194D01  | 17        | 17                   | 17 | 17 | 17 | q | medial              | 17 | 53014210-53212372                      | 2 BAC Ends               |
| zC210P22  | 17 and 21 | 17                   | 17 | 17 | 17 | q | medial              | 17 | 44610301-44756567                      | 2 BAC Ends               |
| zC160F23  | 17        | 17                   | 17 | 17 | 17 | q | medial              | 17 | 38476103-38638750                      | 2 BAC Ends               |
| zC077G03  | 19        | 17                   | NA | NA | 17 | q | medial              | 17 | 15321079-15321770                      | T51 RH Map               |
| zC133L14  | 17        | 17                   | 17 | 17 | 17 | q | distal              | 17 | 18039549-18202654                      | 2 BAC Ends               |
| zC074A06  | 17        | 17                   | NA | NA | 17 | q | distal              | 17 | 1526712-1678416<br>48172473-48185770   | 2 BAC Ends<br>T51 RH Map |
| zK038J10  | 17        | NA                   | 17 | 17 | 17 | q | distal              | NA |                                        |                          |
| zC077G19  | 17        | 17                   | 17 | 17 | 17 | q | subtelomeric        | 17 | 6482566-6669339                        | 2 BAC Ends               |
| zC042B22  | U         | 17                   | 17 | 17 | 17 | q | telomeric           | 17 | 5393544-5573088<br>5394563-5573088     | 2 BAC Ends               |
| zC241L24  | 18        | 18                   | 18 | NA | 18 | p | telomeric           | 18 | 49605027-49761299<br>49605027-49794159 | 2 BAC Ends               |
| zC095I06  | 18        | 18                   | NA | NA | 18 | p | telomeric           | 18 | 46125632-46279646                      | 2 BAC Ends               |
| zK079N12  | NA        | NA                   | 18 | NA | 18 | p | telomeric           | NA |                                        |                          |
| zK003B08  | 18        | NA                   | 18 | 18 | 18 | p | distal              | 18 | 38606591-38619691<br>55577034-55590134 | 1 BAC End                |
| zC255L12  | NA        | NA                   | 18 | 18 | 18 | p | distal              | NA |                                        |                          |
| zK005J13  | 18        | NA                   | NA | NA | 18 | p | near the centromere | 18 | 39825600-40035877                      | 2 BAC Ends               |
| zK150H10  | 18        | NA                   | 18 | U  | 18 | p | near the centromere | 18 | 39751050-39764387                      | 1 BAC End                |
| zK180N16  | 19        | NA                   | 18 | U  | 18 | p | near the centromere | 18 | 35810109-35823451                      | 1 BAC End                |
| zC122K23  | 18        | 18                   | 18 | 18 | 18 | q | near the centromere | 18 | 28798942-28971494                      | 2 BAC Ends               |
| zK016F19  | 18        | NA                   | 18 | NA | 18 | q | proximal            | 18 | 23810982-24018828                      | 2 BAC Ends               |
| zK207D05  | 18        | NA                   | 18 | NA | 18 | q | proximal            | 18 | 18369631-18382992                      | 1 BAC End                |
| zH124C24  | 18        | NA                   | 18 | 18 | 18 | q | proximal            | NA |                                        |                          |
| zK286O23  | 18        | NA                   | 18 | NA | 18 | q | distal              | 18 | 14889191-14902514                      | 1 BAC End                |
| zK263N17  | 18        | NA                   | 18 | NA | 18 | q | distal              | 18 | 13264338-13563907                      | 2 BAC Ends               |
| zC234N07  | 18 and 23 | 18                   | 18 | 18 | 18 | q | distal              | NA |                                        |                          |
| zK283N16  | 18        | NA                   | 18 | 18 | 18 | q | distal              | NA |                                        |                          |
| zK180H12  | 18        | NA                   | 18 | 18 | 18 | q | telomeric           | 18 | 9745594-9758933                        | 1 BAC End                |
| zK014D24  | 18        | NA                   | NA | NA | 18 | q | telomeric           | 18 | 4273066-4286213                        | 1 BAC End                |
| zK089B17  | 19        | NA                   | 19 | 19 | 19 | p | telomeric           | 19 | 5083126-5096357                        | 1 BAC End                |
| zC039E15  | 19        | 1, 15, 17,<br>and 19 | 19 | 19 | 19 | p | telomeric           | 19 | 5999779-6170827                        | 2 BAC Ends               |
| zK263H23  | 20        | NA                   | 19 | 19 | 19 | p | distal              | 19 | 1055716-1068859                        | 1 BAC End                |
| zK218F09  | 18        | NA                   | 19 | 19 | 19 | p | distal              | 19 | 4435068-4598775                        | 2 BAC Ends               |
| zKp024A07 | NA        | NA                   | 19 | 19 | 19 | p | distal              | NA |                                        |                          |
| zC234F14  | NA        | NA                   | 19 | 19 | 19 | p | medial              | NA |                                        |                          |

|           |          |    |    |    |    |   |                     |    |                                        |            |
|-----------|----------|----|----|----|----|---|---------------------|----|----------------------------------------|------------|
| zC245H07  | NA       | NA | 19 | 19 | 19 | p | medial              | NA |                                        |            |
| zK222B08  | 19       | NA | 19 | 19 | 19 | p | proximal            | 2  | 11924256-11937604                      | 1 BAC End  |
| zC001J13  | 19       | 19 | 19 | 19 | 19 | p | proximal            | 19 | 15199786-15378202                      | 2 BAC Ends |
| zK219L12  | 19       | NA | 19 | 19 | 19 | p | proximal            | 19 | 23727698-23741070                      | 1 BAC End  |
| zC143E20  | 19       | 19 | 19 | NA | 19 | p | proximal            | 19 | 32158503-32171765                      | 1 BAC End  |
| zC132A16  | 19       | 19 | NA | NA | 19 | p | near the centromere | 19 | 37098897-37446879                      | 2 BAC Ends |
| zK025E11  | 19       | NA | 19 | 19 | 19 | q | near the centromere | 19 | 13834242-14040211                      | 2 BAC Ends |
| zC239D06  | 14       | 19 | 19 | 19 | 19 | q | near the centromere | 19 | 19919723-19932793                      | 1 BAC End  |
| zC195B13  | 12       | 12 | 19 | 19 | 19 | q | near the centromere | 12 | 23223873-23385646                      | 2 BAC Ends |
| zC254E15  | 19       | 19 | 19 | 19 | 19 | q | medial              | 19 | 44513909-44653658                      | 2 BAC Ends |
| bZ045K05  | 19       | NA | 19 | 19 | 19 | q | medial              | NA |                                        |            |
| zC194E15  | 19       | 19 | 19 | 19 | 19 | q | subtelomeric        | 19 | 31956265-32171765                      | 2 BAC Ends |
| zK201G07  | 21       | NA | 19 | NA | 19 | q | telomeric           | 19 | 42699599-42712972                      | 1 BAC End  |
| zC036I10  | 19       | 19 | NA | NA | 19 | q | telomeric           | 19 | 49766723-49932919                      | 2 BAC Ends |
| zC118G14  | 20       | 20 | NA | NA | 20 | p | telomeric           | 20 | 426186-439563                          | T51 RH Map |
| zK077B17  | NA       | NA | 20 | 20 | 20 | p | telomeric           | NA |                                        |            |
| zC236C21  | NA       | 20 | 20 | NA | 20 | p | subtelomeric        | NA |                                        |            |
| zC257G08  | NA       | NA | 20 | 20 | 20 | p | subtelomeric        | NA |                                        |            |
| zC241J12  | 20       | 20 | 20 | 20 | 20 | p | distal              | 20 | 203076-361689                          | 2 BAC Ends |
| zK060A16  | 20       | NA | 20 | 20 | 20 | p | distal              | NA |                                        |            |
| zKp059G05 | NA       | NA | 20 | NA | 20 | p | distal              | NA |                                        |            |
| zC272F15  | 20       | 20 | 20 | 20 | 20 | p | medial              | 20 | 3895697-3909120<br>4067776-4081199     | 1 BAC End  |
| zK242M13  | 5        | NA | NA | 5  | 20 | p | medial              | 5  | 47857283-47870671                      | 1 BAC End  |
| zK080I09  | 2        | NA | NA | NA | 20 | p | medial              | NA |                                        |            |
| zK023K06  | 20       | NA | 20 | 20 | 20 | p | proximal            | 20 | 28626656-28873284                      | 2 BAC Ends |
| zC045M15  | 20       | 20 | 20 | NA | 20 | p | proximal            | 20 | 3396516-3704807<br>3396516-3701195     | 2 BAC Ends |
| zC191D07  | 20       | 20 | 20 | 20 | 20 | p | near the centromere | NA |                                        |            |
| zK019F21  | NA       | NA | 20 | 20 | 20 | p | near the centromere | NA |                                        |            |
| zK038F05  | 18       | NA | NA | NA | 20 | q | near the centromere | 18 | 19289634-19302754                      | 1 BAC End  |
| zK033I22  | 20       | NA | 20 | 20 | 20 | q | near the centromere | 20 | 20283093-20520186                      | 2 BAC Ends |
| zK015B08  | 20       | NA | NA | NA | 20 | q | near the centromere | 20 | 24200016-24449760                      | 2 BAC Ends |
| zK181I03  | 20       | NA | 20 | 20 | 20 | q | proximal            | 20 | 1423595-1436881                        | 1 BAC End  |
| zC214H24  | 1 and 20 | 20 | 20 | NA | 20 | q | proximal            | 20 | 22047422-22290255                      | 2 BAC Ends |
| zK219E20  | 20       | NA | 20 | 20 | 20 | q | proximal            | 20 | 24580213-24740749                      | 2 BAC Ends |
| zK014A07  | 20       | NA | 20 | 20 | 20 | q | medial              | 20 | 51816709-51829794                      | 1 BAC End  |
| zC195D17  | 3 and 20 | 16 | 20 | 20 | 20 | q | medial              | 16 | 27366713-27469831<br>27366713-27576225 | 2 BAC Ends |
| zC266I18  | 20       | 20 | 20 | NA | 20 | q | medial              | NA |                                        |            |
| zK025E12  | 20       | NA | 20 | 20 | 20 | q | distal              | 20 | 31724992-31935130                      | 2 BAC Ends |

|          |    |           |    |    |    |   |                     |           |                                                        |                        |
|----------|----|-----------|----|----|----|---|---------------------|-----------|--------------------------------------------------------|------------------------|
| zK097O05 | 20 | NA        | 20 | 20 | 20 | q | distal              | 20        | 35201568-35214932                                      | 1 BAC End              |
| zC063O20 | 20 | 20        | 20 | 20 | 20 | q | distal              | 20        | 36091784-36256857                                      | 2 BAC Ends             |
| zK221H15 | 20 | NA        | 20 | 20 | 20 | q | distal              | 20        | 46050421-46237734                                      | 2 BAC Ends             |
| zC180B22 | 20 | 11 and 20 | 20 | 20 | 20 | q | distal              | 20        | 57062587-57213698                                      | 2 BAC Ends             |
| zK241L07 | 20 | NA        | 20 | 20 | 20 | q | distal              | 20        | 57737765-57920906                                      | 2 BAC Ends             |
| zC153J24 | 20 | 20        | 20 | 20 | 20 | q | telomeric           | 20        | 55135058-55316460                                      | 2 BAC Ends             |
| zC134L13 | 20 | 20        | NA | NA | 20 | q | telomeric           | 20        | 57235006-57235350                                      | T51 RH Map             |
| zC122A16 | 21 | 21        | NA | NA | 21 | p | telomeric           | 21        | 48612405-48773329                                      | 2 BAC Ends             |
| zK235H13 | NA | NA        | NA | U  | 21 | p | telomeric           | NA        |                                                        |                        |
| zK287G19 | 21 | NA        | 21 | NA | 21 | p | subtelomeric        | 21        | 49247171-49429313                                      | 2 BAC Ends             |
| zC065O02 | 21 | 21        | NA | NA | 21 | p | distal              | 21        | 46082212-46082906                                      | T51 RH Map             |
| zK036I03 | 21 | NA        | 21 | NA | 21 | p | distal              | 19 and 21 | chr 21: 44937821-44950936<br>chr 19: 43010078-43023207 | 1 BAC End<br>1 BAC End |
| zK192J13 | NA | NA        | 21 | NA | 21 | p | near the centromere | NA        |                                                        |                        |
| zC051A20 | 21 | 21        | 21 | 21 | 21 | q | near the centromere | 21        | 19908772-20113260                                      | 2 BAC Ends             |
| zK125B07 | NA | NA        | 21 | 21 | 21 | q | medial              | NA        |                                                        |                        |
| zK202I08 | U  | NA        | 21 | NA | 21 | q | distal              | 21        | 9468945-9482256                                        | 1 BAC End              |
| zK190E02 | 21 | NA        | 21 | NA | 21 | q | distal              | NA        |                                                        |                        |
| zK014M09 | 21 | NA        | NA | NA | 21 | q | telomeric           | 21        | 128465-141586                                          | 1 BAC End              |
| zK002J07 | 22 | NA        | NA | NA | 22 | p | telomeric           | 22        | 45560686-45761213                                      | 2 BAC Ends             |
| zC079M20 | 22 | 22        | 22 | 22 | 22 | p | telomeric           | 22        | 38500984-38514273<br>39246105-39259394                 | 1 BAC End              |
| zK250M06 | 9  | NA        | 10 | 22 | 22 | p | distal              | 4 and 22  | chr 22: 46275546-46288888<br>chr 4: 32310036-32325665  | 1 BAC End<br>1 BAC End |
| zK037M08 | 22 | NA        | 22 | 22 | 22 | p | distal              | 22        | 44689203-44860594                                      | 2 BAC Ends             |
| zK169I05 | 22 | NA        | 22 | 22 | 22 | p | medial              | 22        | 40114710-40386583                                      | 2 BAC Ends             |
| zC194K01 | 22 | 22        | 22 | 22 | 22 | p | proximal            | 22        | 39643860-39829532                                      | 2 BAC Ends             |
| zK232H18 | NA | NA        | 22 | 22 | 22 | p | proximal            | NA        |                                                        |                        |
| zK004C23 | 22 | NA        | 22 | 22 | 22 | p | near the centromere | 22        | 29343834-29356974                                      | 1 BAC End              |
| zC132L16 | 22 | 22        | NA | NA | 22 | q | near the centromere | 22        | 29699587-29892716                                      | 2 BAC Ends             |
| zC206A19 | 22 | 22        | 22 | 22 | 22 | q | near the centromere | 22        | 23282486-23445108                                      | 2 BAC Ends             |
| zC197A02 | 22 | 22        | 22 | 22 | 22 | q | near the centromere | 22        | 21171187-21356597                                      | 2 BAC Ends             |
| zC171D11 | 22 | 22        | 22 | NA | 22 | q | near the centromere | 22        | 16684025-16834881                                      | 2 BAC Ends             |
| zC197G15 | 22 | 22        | 22 | 22 | 22 | q | proximal            | 22        | 26670630-26877695                                      | 2 BAC Ends             |
| zK222F02 | 17 | NA        | 22 | 22 | 22 | q | proximal            | NA        |                                                        |                        |
| zK240E12 | NA | NA        | 22 | 22 | 22 | q | proximal            | NA        |                                                        |                        |
| zK078L04 | NA | NA        | 22 | 22 | 22 | q | medial              | NA        |                                                        |                        |
| zK192M14 | 22 | NA        | 22 | 22 | 22 | q | distal              | 22        | 16673790-16928514                                      | 2 BAC Ends             |
| zC248M18 | 22 | 22        | 22 | 22 | 22 | q | distal              | 22        | 16069511-16242025<br>16069511-16240801                 | 2 BAC Ends             |
| zK004C15 | 22 | NA        | 22 | 22 | 22 | q | distal              | 22        | 3234712-3247830                                        | 1 BAC End              |

|           |           |                     |    |    |    |   |                     |    |                                                       |                         |
|-----------|-----------|---------------------|----|----|----|---|---------------------|----|-------------------------------------------------------|-------------------------|
| zC246M06  | NA        | NA                  | 22 | 22 | 22 | q | distal              | NA |                                                       |                         |
| zC103F16  | 22        | 22                  | 22 | NA | 22 | q | subtelomeric        | 22 | 11277011-11435032                                     | 2 BAC Ends              |
| zC168K08  | 22        | 22                  | 22 | 22 | 22 | q | subtelomeric        | 22 | 10898236-11022754                                     | 2 BAC Ends              |
| zK020I20  | 22        | NA                  | 22 | 22 | 22 | q | subtelomeric        | 22 | 3409145-3639844                                       | 2 BAC Ends              |
| zKp079B07 | 22        | 22                  | 22 | 22 | 22 | q | subtelomeric        | 22 | 2931577-3122823                                       | 2 BAC Ends              |
| zC009D01  | 19 and 22 | 10 and 22           | NA | NA | 22 | q | telomeric           | 22 | 5382679-5395862<br>5774734-5787917<br>3558268-3716759 | 1 BAC End<br>2 BAC Ends |
| zC118M01  | 17 and 22 | 22                  | 22 | 22 | 22 | q | telomeric           | 22 |                                                       |                         |
| zK015H08  | NA        | NA                  | 22 | 22 | 22 | q | telomeric           | NA |                                                       |                         |
| zC041B11  | 23        | 23                  | NA | NA | 23 | p | telomeric           | 23 | 5616496-5774855                                       | 2 BAC Ends              |
| zC220I18  | 23        | 23                  | 23 | 23 | 23 | p | subtelomeric        | 23 | 9731503-9948563                                       | 2 BAC Ends              |
| zC051C19  | 23        | 7 and 23            | NA | NA | 23 | p | near the centromere | 23 | 14938690-15102787                                     | 2 BAC Ends              |
| zC195I16  | U         | 7                   | 23 | 23 | 23 | q | near the centromere | 7  | 39049299-39157681                                     | 2 BAC Ends              |
| zC226M16  | 23        | 23                  | 23 | 23 | 23 | q | near the centromere | 23 | 51849382-51862660                                     | 1 BAC End               |
| zK151G10  | 23        | NA                  | 23 | 23 | 23 | q | proximal            | 23 | 27629780-27788285                                     | 2 BAC Ends              |
| zK166N08  | 23        | NA                  | 23 | 23 | 23 | q | medial              | 23 | 31445054-31458401<br>31835829-31849176                | 1 BAC End               |
| zC087H10  | 23        | 23                  | 23 | NA | 23 | q | medial              | NA |                                                       |                         |
| zC059K08  | 6         | 6, 8, 19,<br>and 23 | 6  | NA | 23 | q | telomeric           | 6  | 52349901-52363213                                     | 1 BAC End               |
| zC214H13  | NA        | NA                  | 23 | 23 | 23 | q | telomeric           | NA |                                                       |                         |
| zK022E19  | 24        | NA                  | NA | NA | 24 | p | telomeric           | 24 | 1829835-1842955                                       | 1 BAC End               |
| zK018N12  | 24        | NA                  | 24 | 24 | 24 | p | telomeric           | 24 | 4856363-5099040                                       | 2 BAC Ends              |
| zC261O07  | U         | 24                  | 24 | 24 | 24 | p | subtelomeric        | U  | 5830296-5975505                                       | 2 BAC Ends              |
| zK001A04  | 24        | NA                  | NA | NA | 24 | p | medial              | 24 | 8573267-8884262                                       | 2 BAC Ends              |
| zC014G13  | NA        | NA                  | 24 | 24 | 24 | q | near the centromere | NA |                                                       |                         |
| zC161H07  | NA        | 24                  | NA | 24 | 24 | q | near the centromere | NA |                                                       |                         |
| zK001P06  | 24        | NA                  | 24 | 24 | 24 | q | medial              | 24 | 26124047-26137165                                     | 1 BAC End               |
| zC089L23  | NA        | 3 and 7             | 24 | NA | 24 | q | medial              | NA |                                                       |                         |
| zK162H01  | NA        | NA                  | 24 | 24 | 24 | q | medial              | NA |                                                       |                         |
| zK226L10  | NA        | NA                  | 24 | 24 | 24 | q | medial              | NA |                                                       |                         |
| zK124I03  | 24        | NA                  | 24 | NA | 24 | q | telomeric           | 24 | 9909626-9922970                                       | 1 BAC End               |
| zC118G02  | 17 and 24 | 24                  | NA | NA | 24 | q | telomeric           | 24 | 40764335-40921293<br>40764335-40955554                | 2 BAC Ends              |
| zK021G19  | NA        | NA                  | NA | 24 | 24 | q | telomeric           | NA |                                                       |                         |
| zC096F02  | 25        | 25                  | NA | NA | 25 | p | telomeric           | 25 | 33175593-33340497                                     | 2 BAC Ends              |
| zKp007F01 | NA        | NA                  | 25 | 25 | 25 | p | medial              | NA |                                                       |                         |
| zK019L19  | U         | NA                  | 25 | NA | 25 | p | near the centromere | 25 | 26763122-26776263                                     | 1 BAC End               |
| zK155H01  | 13        | NA                  | 25 | NA | 25 | q | near the centromere | 25 | 25812239-25825490                                     | 1 BAC End               |
| zC220G18  | 25        | 25                  | 25 | 25 | 25 | q | near the centromere | 25 | 24647669-24660986                                     | 1 BAC End               |
| zK044K01  | U         | NA                  | 25 | 25 | 25 | q | near the centromere | 25 | 13078916-13092063                                     | 1 BAC End               |

|          |    |    |    |    |    |   |                     |    |                                                             |            |
|----------|----|----|----|----|----|---|---------------------|----|-------------------------------------------------------------|------------|
| zC059O09 | 25 | 25 | 25 | 25 | 25 | q | near the centromere | 25 | 11514557-11527868<br>31179510-31192771                      | 1 BAC End  |
| zC226K23 | 25 | 25 | 25 | 25 | 25 | q | proximal            | 25 | 10657370-10670645                                           | 1 BAC End  |
| zC059G12 | 25 | 25 | NA | NA | 25 | q | medial              | 25 | 17075400-17088685<br>17977447-17990723<br>18182542-18195818 | 1 BAC End  |
| zK007N16 | 25 | NA | 25 | 25 | 25 | q | subtelomeric        | 25 | 6124060-6137170                                             | 1 BAC End  |
| zC087L10 | 25 | 25 | NA | NA | 25 | q | telomeric           | 25 | 3400941-3401116                                             | T51 RH Map |

\*Based upon data obtained as of August 2006

†Mapped unambiguously to an unknown chromosome (chromosome U)

‡NA: BAC clone is not in the database
