# Supplementary material for: Definition of the zebrafish genome using flow cytometry and cytogenetic mapping
Source: PubMed Central journal article supplement (PMC1925092; doi:10.1186/1471-2164-8-195), 2007-06-27
Supplement: 1471-2164-8-195-S2.pdf [file 1471-2164-8-195-S2.pdf]

**Additional file 2.** A table summarizing the concordance of the chromosomal locations assigned by cytogenetic mapping with the most current build of the zebrafish genome assembly (Zv6-as of May 2007).

|                                                                    | <b>No. of clones<sup>*</sup></b> | <b>Percent of clones</b> |
|--------------------------------------------------------------------|----------------------------------|--------------------------|
| Clones not in UCSC database                                        | 109                              | 21.4                     |
| Clones present in UCSC database                                    | 401                              | 78.6                     |
| Agree                                                              | 332                              | 82.8                     |
| Disagree                                                           | 41                               | 10.2                     |
| Map to multiple chromosomes<br>by database and at least 1<br>agree | 13                               | 3.3                      |
| Map to multiple chromosomes<br>by database and none agree          | 6                                | 1.5                      |
| Mapped to “U” <sup>†</sup>                                         | 9                                | 2.2                      |

<sup>\*</sup>Total number of clones based upon the 510 BAC clones assigned to a unique LG chromosome by FISH mapping

<sup>†</sup>Mapped unambiguously to an unknown chromosome (chromosome U)
