# Supplementary material for: Definition of the zebrafish genome using flow cytometry and cytogenetic mapping
Source: PubMed Central journal article supplement (PMC1925092; doi:10.1186/1471-2164-8-195), 2007-06-27
Supplement: 1471-2164-8-195-S3.pdf [file 1471-2164-8-195-S3.pdf]

**Additional file 3.** A table listing the BAC clones observed to hybridize to multiple locations within the zebrafish genome using FISH.

| BAC clone | LG by UCSC genome browser* | LG by Ensembl (Zv6-version 40)* | LG by Sanger WebFPC database* | LG by Vega (v20)* | Number of chromosomes with signals |
|-----------|----------------------------|---------------------------------|-------------------------------|-------------------|------------------------------------|
| zC034K01  | 15                         | 15                              | 15                            | 15                | 2                                  |
| zC056F12  | 3 and 16                   | 3                               | 3                             | NA                | 2                                  |
| zC059G18  | 9 and 20                   | 9, 12, and 14                   | 14                            | NA                | 25                                 |
| zC106F05  | 15                         | 15                              | 15                            | NA                | 2                                  |
| zC113C15  | U <sup>†</sup>             | NA                              | 18                            | NA                | 2                                  |
| zC127B06  | 12                         | 20                              | 15                            | 15                | 4                                  |
| zC140G02  | 18                         | NA                              | 18                            | NA                | 2                                  |
| zC141M16  | U                          | 13 and 14                       | 13                            | 13                | 2                                  |
| zC154A22  | U                          | 15                              | 15                            | 15                | 2                                  |
| zC165K16  | 18                         | 18                              | 18                            | 18                | 2                                  |
| zC211K08  | 22                         | 22                              | 22                            | 22                | 2                                  |
| zC213I06  | U                          | 6 and 21                        | 6                             | 6                 | 2                                  |
| zC214J02  | 7                          | 7                               | 7                             | 7                 | 3                                  |
| zC266I02  | 14                         | 14                              | 13                            | 13                | 2                                  |
| zC270H11  | NA                         | NA                              | 10                            | 10                | >5                                 |
| zC273A05  | 5                          | 6 and 14                        | 14                            | 14                | 25                                 |
| zC273E20  | NA                         | NA                              | 14                            | NA                | 2                                  |
| zK006A12  | 18                         | NA                              | 18                            | NA                | >5                                 |
| zK011B07  | 11                         | NA                              | NA                            | NA                | 25                                 |
| zK023F09  | 11                         | NA                              | 11                            | NA                | 2                                  |
| zK024H22  | 10                         | NA                              | 1                             | 1                 | 2                                  |
| zK048M05  | 10 and 17                  | NA                              | 10                            | NA                | 4                                  |
| zK075B12  | 14                         | NA                              | NA                            | NA                | 2                                  |
| zK110G07  | 3                          | NA                              | 3                             | 3                 | 2                                  |
| zK110G19  | 13                         | NA                              | 4                             | 4                 | 1 (2 signals)                      |
| zK120I24  | U                          | NA                              | NA                            | U                 | >5                                 |
| zK168J09  | 22                         | NA                              | 22                            | 22                | >5                                 |
| zK171K22  | 7                          | NA                              | 7                             | NA                | 25                                 |
| zK171O17  | 22                         | NA                              | 22                            | 22                | >5                                 |
| zK173B08  | 2                          | NA                              | NA                            | NA                | 25                                 |
| zK246K02  | 14                         | NA                              | 14                            | 14                | 2                                  |

\*Based upon data obtained as of August 2006

<sup>†</sup>Mapped unambiguously to an unknown chromosome (chromosome U)

<sup>‡</sup>NA: BAC clone is not in the database
