# Supplementary material for: Definition of the zebrafish genome using flow cytometry and cytogenetic mapping
Source: PubMed Central journal article supplement (PMC1925092; doi:10.1186/1471-2164-8-195), 2007-06-27
Supplement: 1471-2164-8-195-S4.pdf [file 1471-2164-8-195-S4.pdf]

**Additional file 4.** A table summarizing the sequencing status of the 510 BAC clones cytogenetically mapped to unique chromosomal locations in this study.

|                                                  | <b>No. of clones<sup>*</sup></b> | <b>Percent of clones</b> |
|--------------------------------------------------|----------------------------------|--------------------------|
| Sequencing complete and match                    | 441                              | 86.5                     |
| Completely sequenced and<br>2 BAC ends sequenced | 147                              | 33.3                     |
| Complete sequence only                           | 19                               | 4.3                      |
| 2 BAC ends only                                  | 251                              | 56.9                     |
| 1 BAC end only                                   | 24                               | 5.5                      |
| No significant matches                           | 13                               | 2.5                      |
| Sequencing in progress                           | 54                               | 10.6                     |
| Sequencing cancelled                             | 2                                | 0.4                      |

<sup>\*</sup>Total number of clones based upon the 510 BAC clones assigned to a unique LG chromosome by FISH mapping
